# Supplementary material for: Efficient chemoenzymatic synthesis of biotinylated human serum albumin–sialoglycoside conjugates containing O-acetylated sialic acids
Source: Royal Society of Chemistry journal article supplement (doi:10.1039/b706507h), 2007-01-01

# Efficient chemoenzymatic synthesis of biotinylated human serum albumin–sialoglycoside conjugates containing *O*-acetylated sialic acids

Hai Yu,<sup>a</sup> Harshal A. Chokhawala,<sup>a</sup> Ajit Varki<sup>b</sup> and Xi Chen<sup>a\*</sup>

<sup>a</sup>*Department of Chemistry, University of California-Davis, One Shields Avenue, Davis, CA 95616, USA.*

<sup>b</sup>*Departments of Medicine and Cellular & Molecular Medicine, University of California-San Diego, La Jolla, CA 92093, USA.*

## ELECTRONIC SUPPLEMENTARY INFORMATION

<sup>1</sup>H and <sup>13</sup>C NMR spectra for compounds **8-11**;

<sup>1</sup>H NMR spectra for compounds **12-15** and **25-28**.

$^1\text{H}$  and  $^{13}\text{C}$  NMR spectra of Neu5Ac $\alpha$ 2,6GalNAc $\alpha$ ProN $_3$  (8)

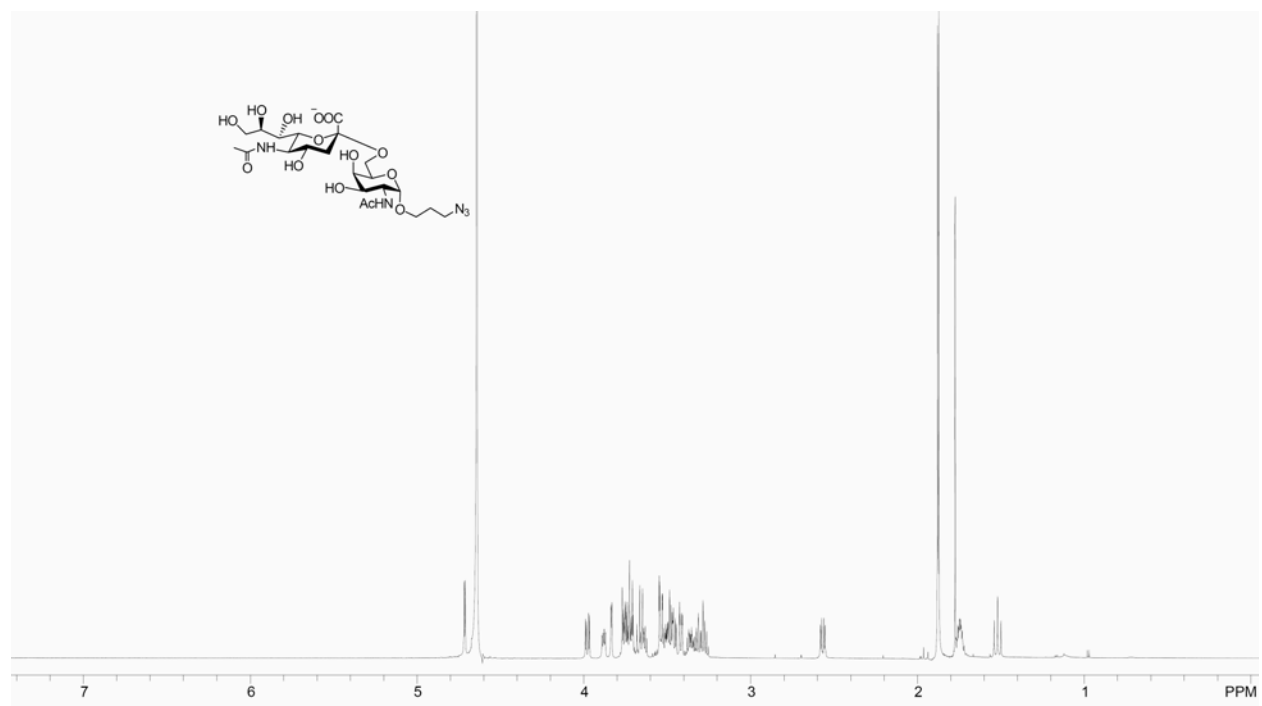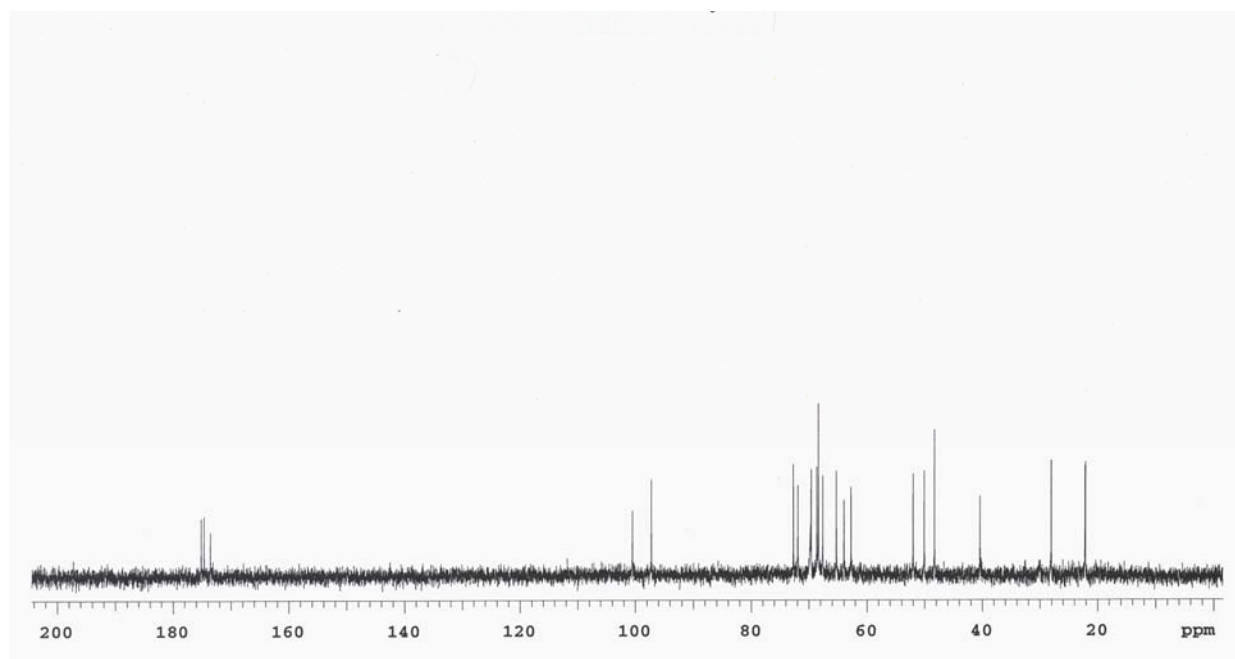

$^1\text{H}$  and  $^{13}\text{C}$  NMR spectra of Neu5Gc $\alpha$ 2,6GalNAc $\alpha$ ProN $_3$  (9)

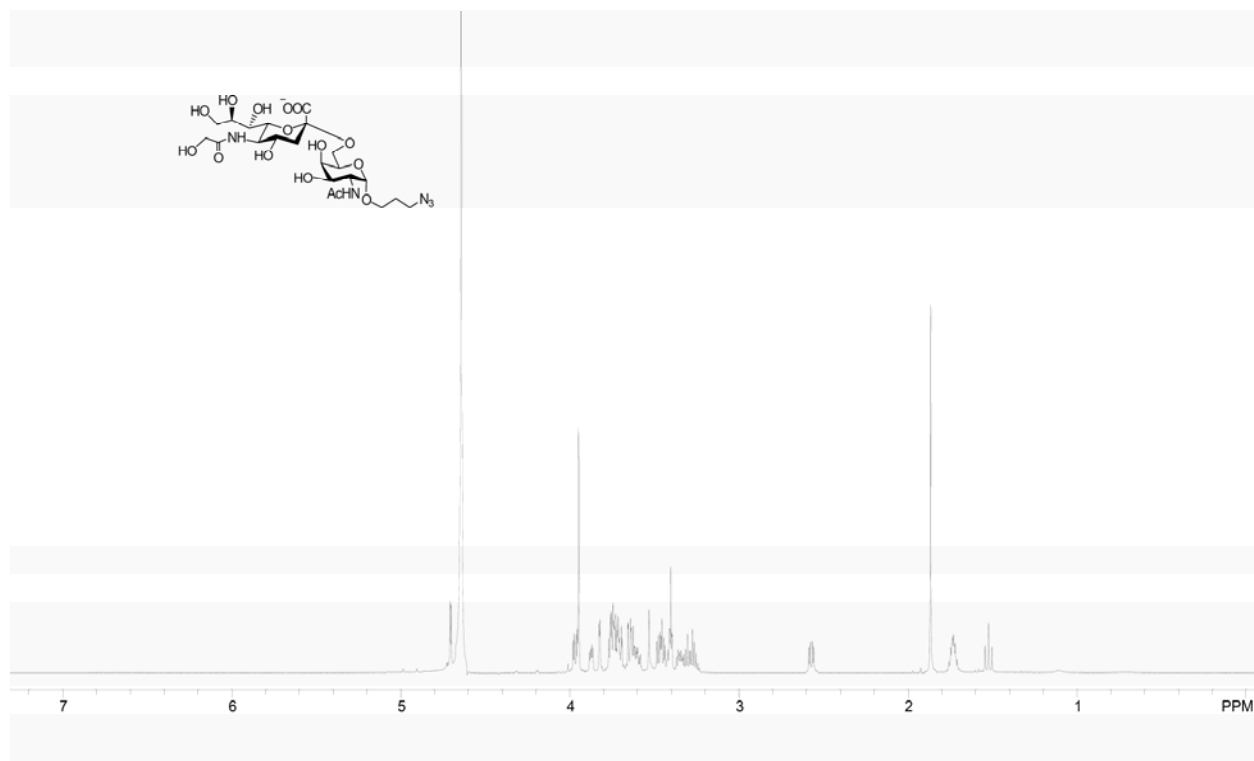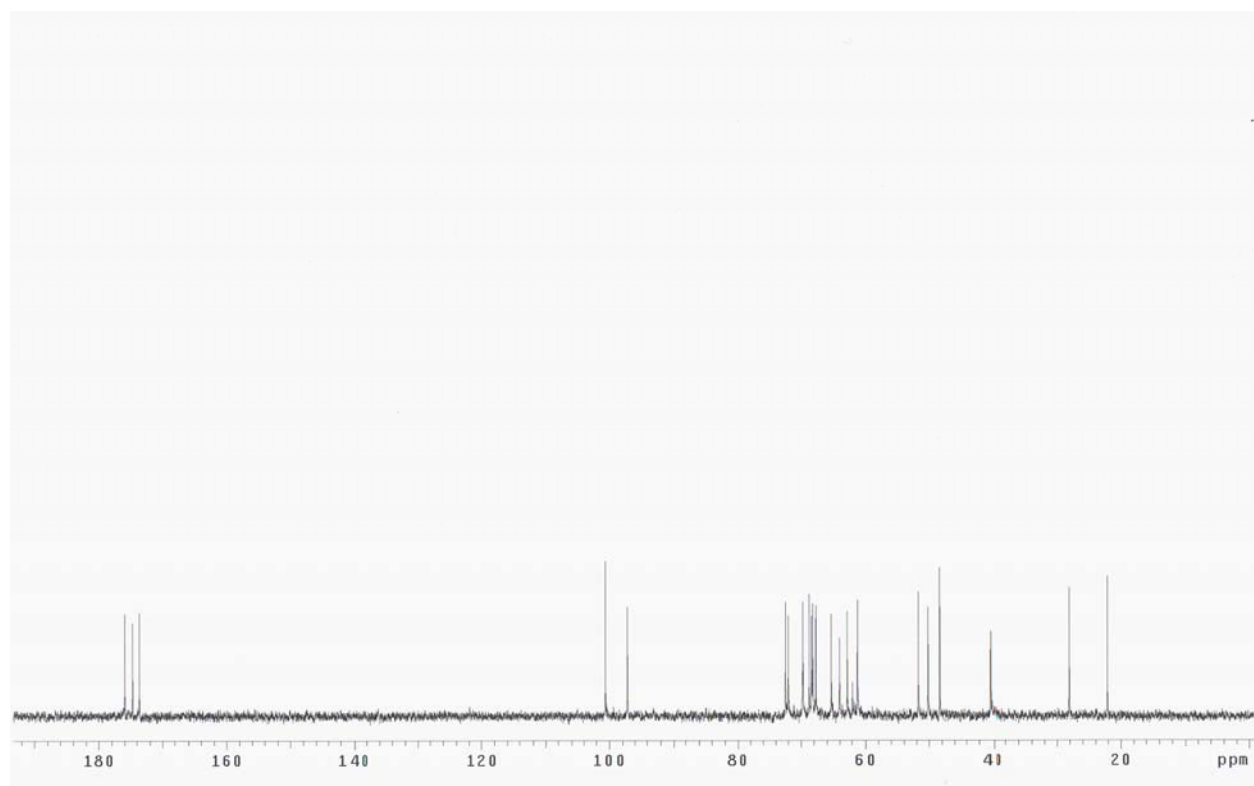

$^1\text{H}$  and  $^{13}\text{C}$  NMR spectra of Neu5,9Ac $_2$  $\alpha$ 2,6GalNAc $\alpha$ ProN $_3$  (10)

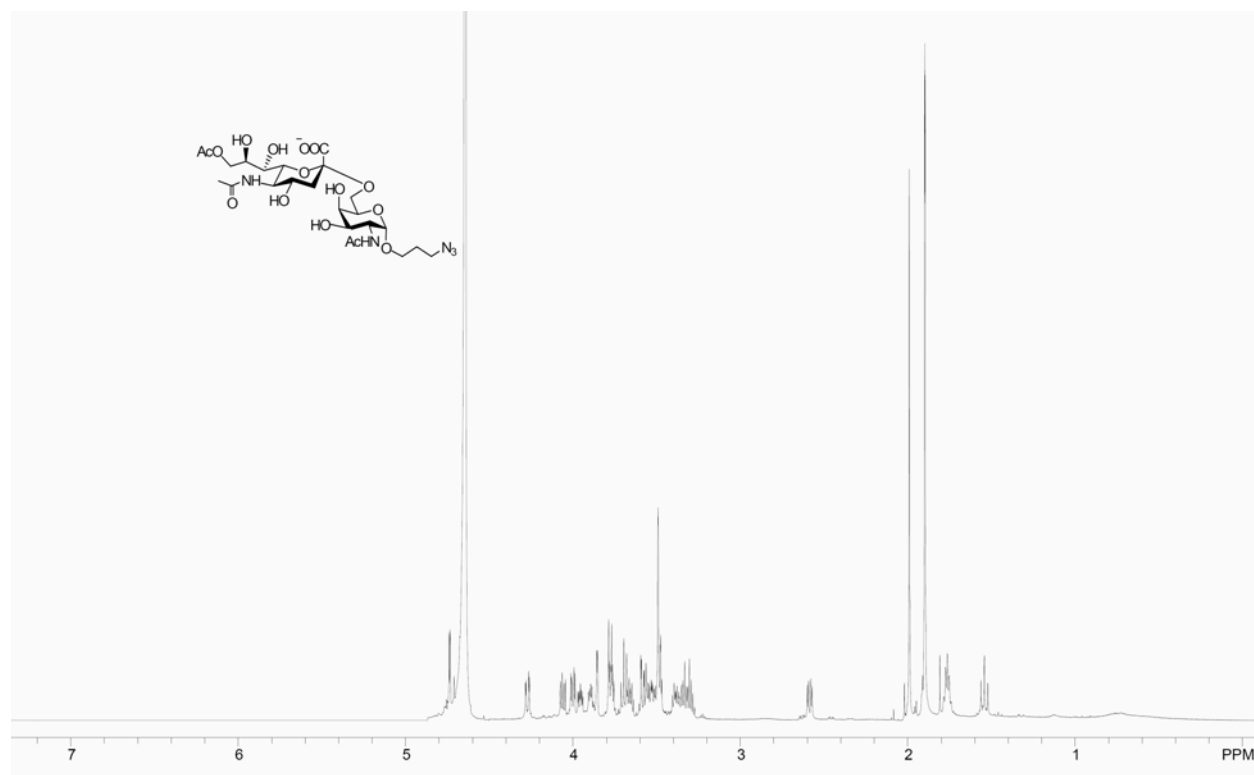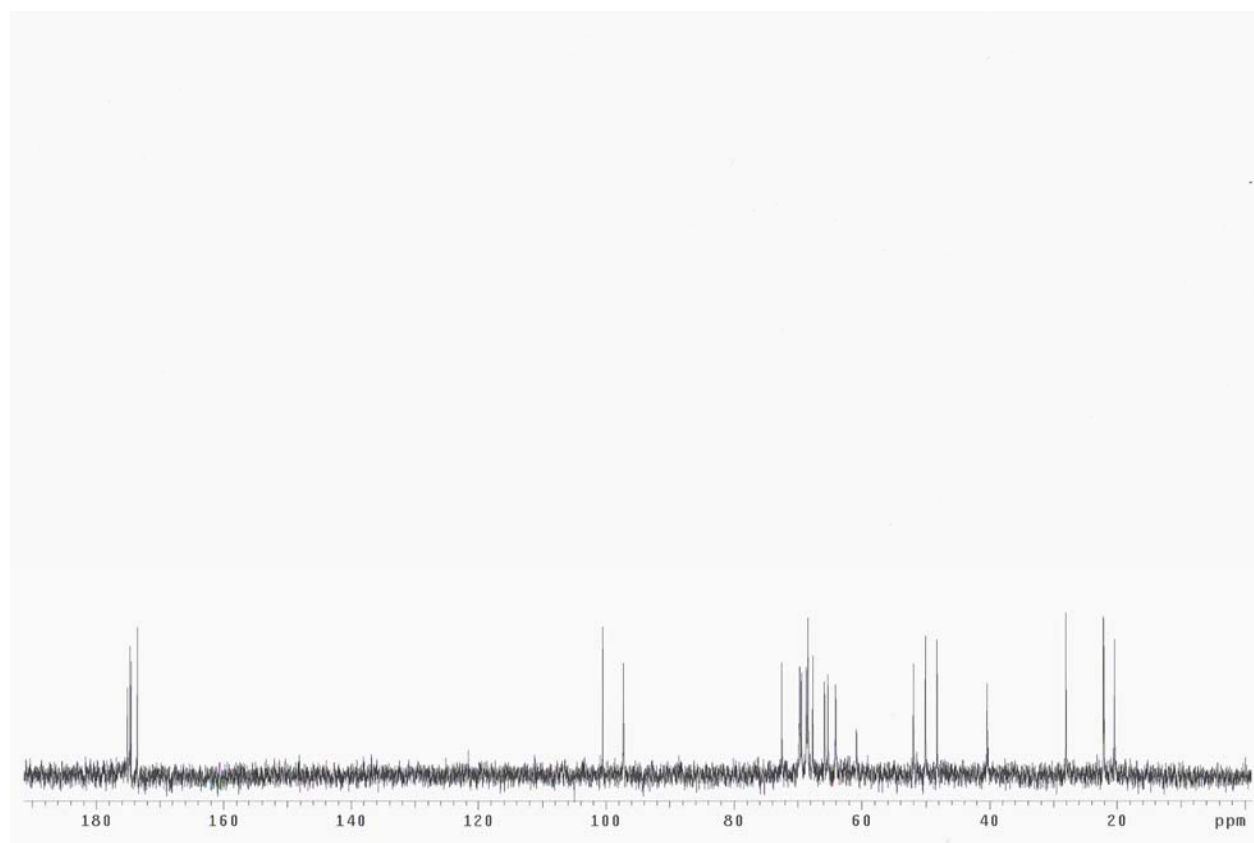

$^1\text{H}$  and  $^{13}\text{C}$  NMR spectra of Neu9Ac5Gc $\alpha$ 2,6GalNAc $\alpha$ ProN $_3$  (11)

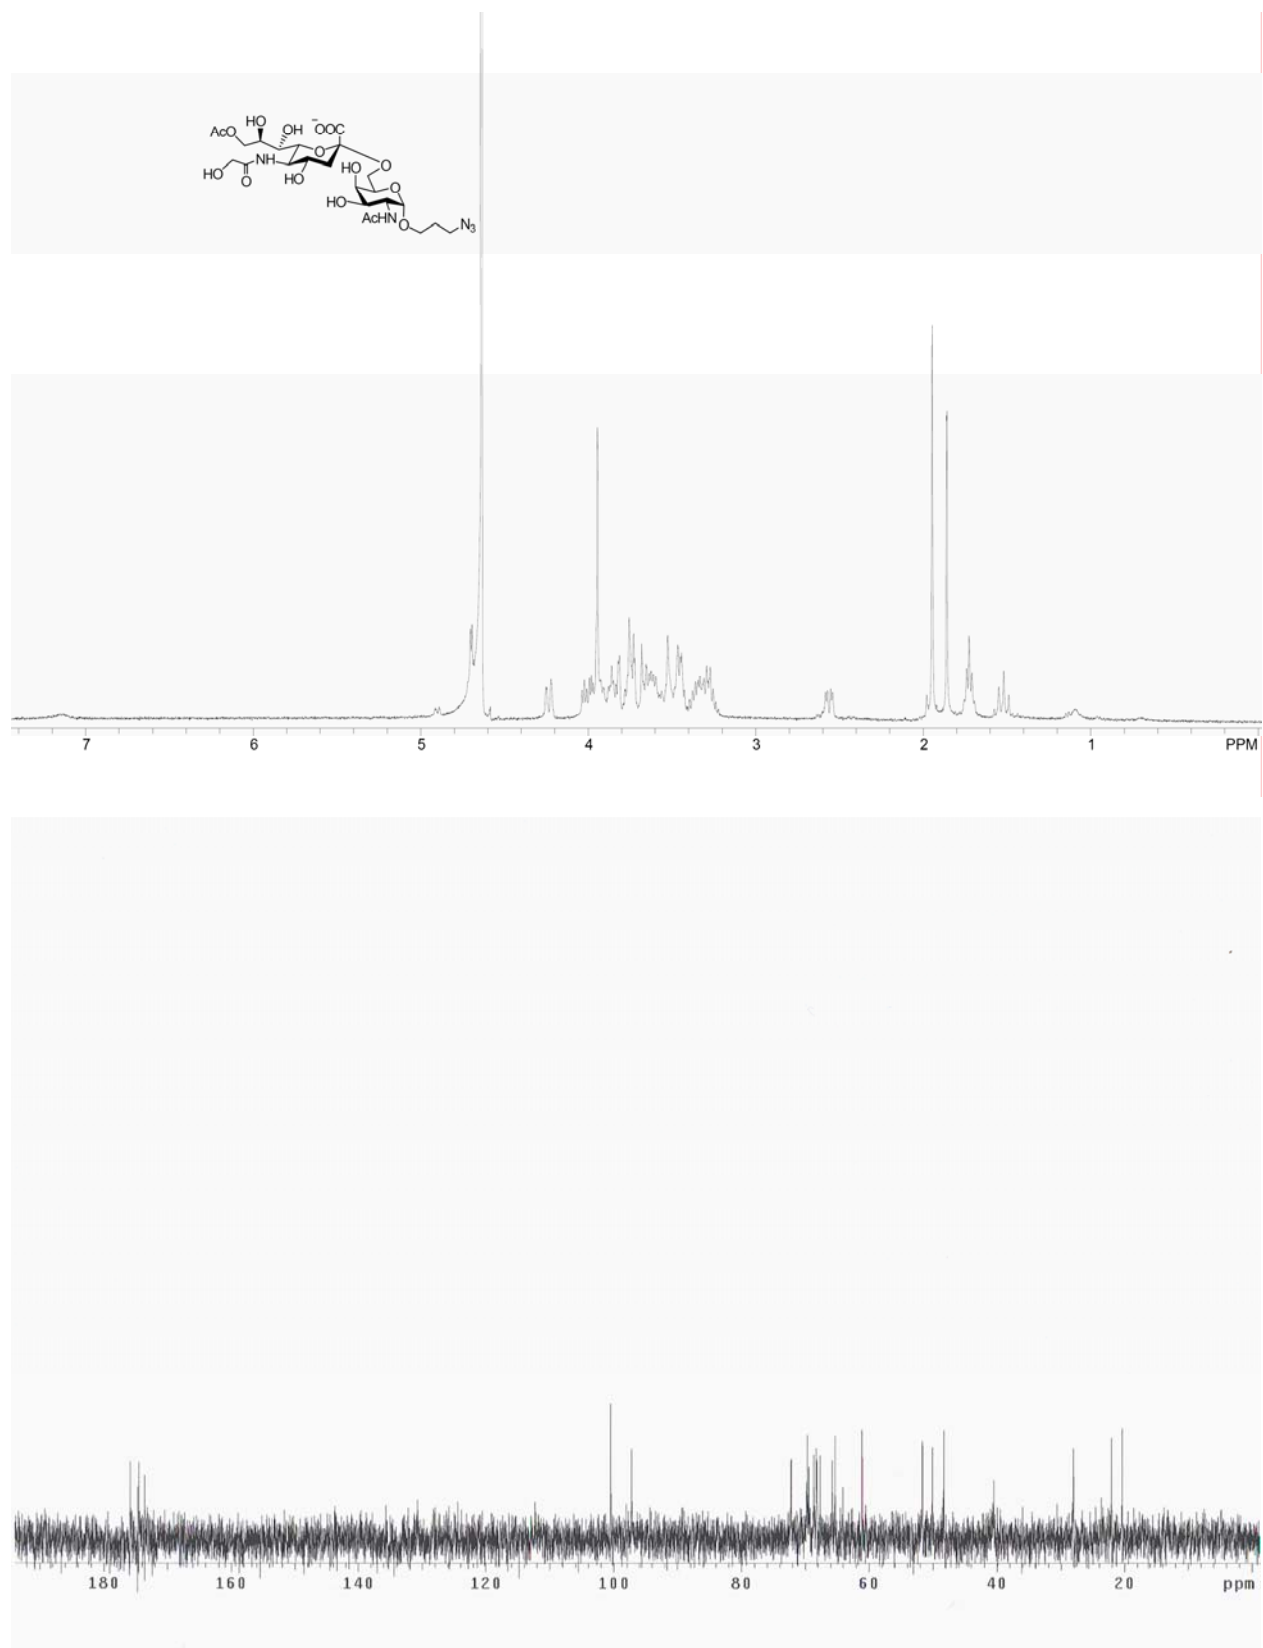

$^1\text{H}$  NMR spectrum of **12**

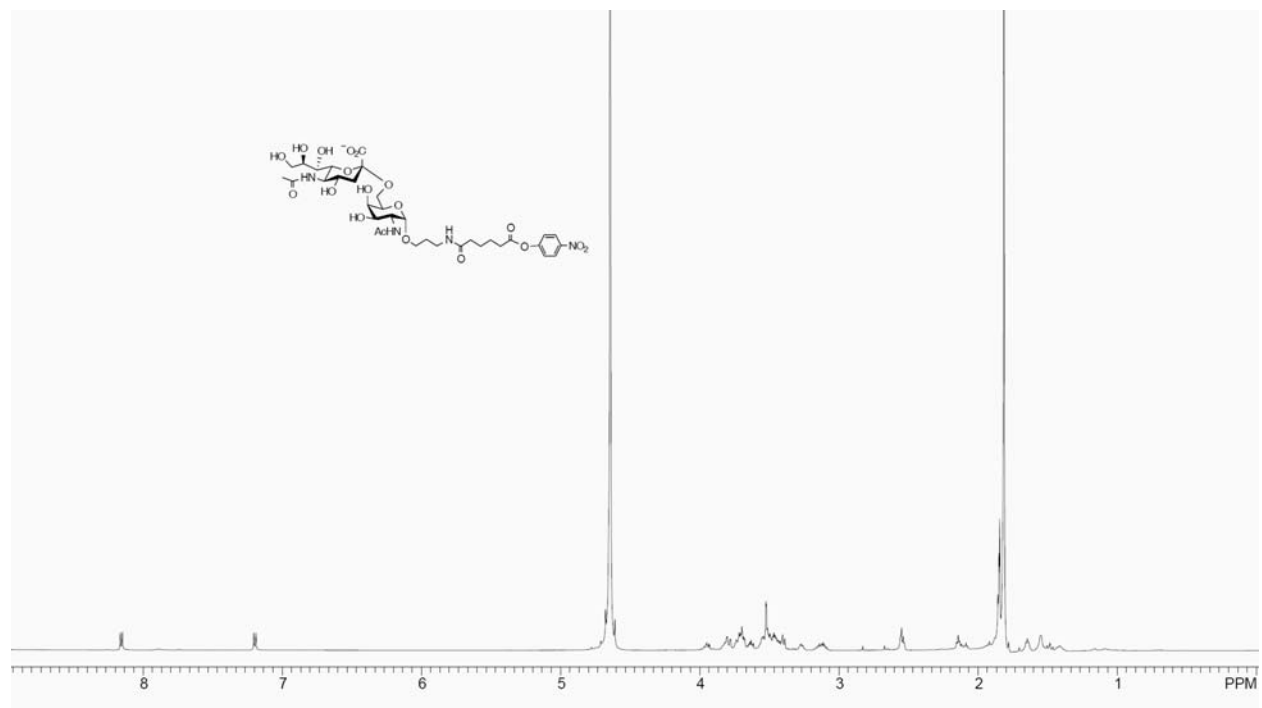

$^1\text{H}$  NMR spectrum of **13**

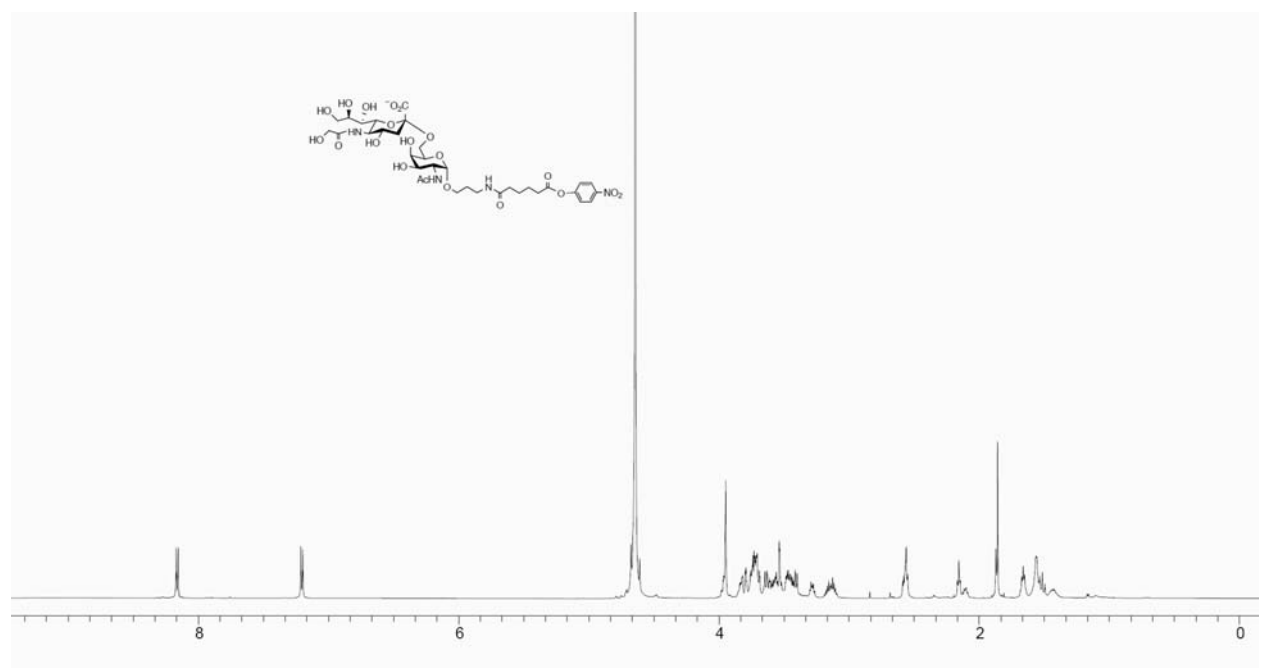

$^1\text{H}$  NMR spectrum of **14**

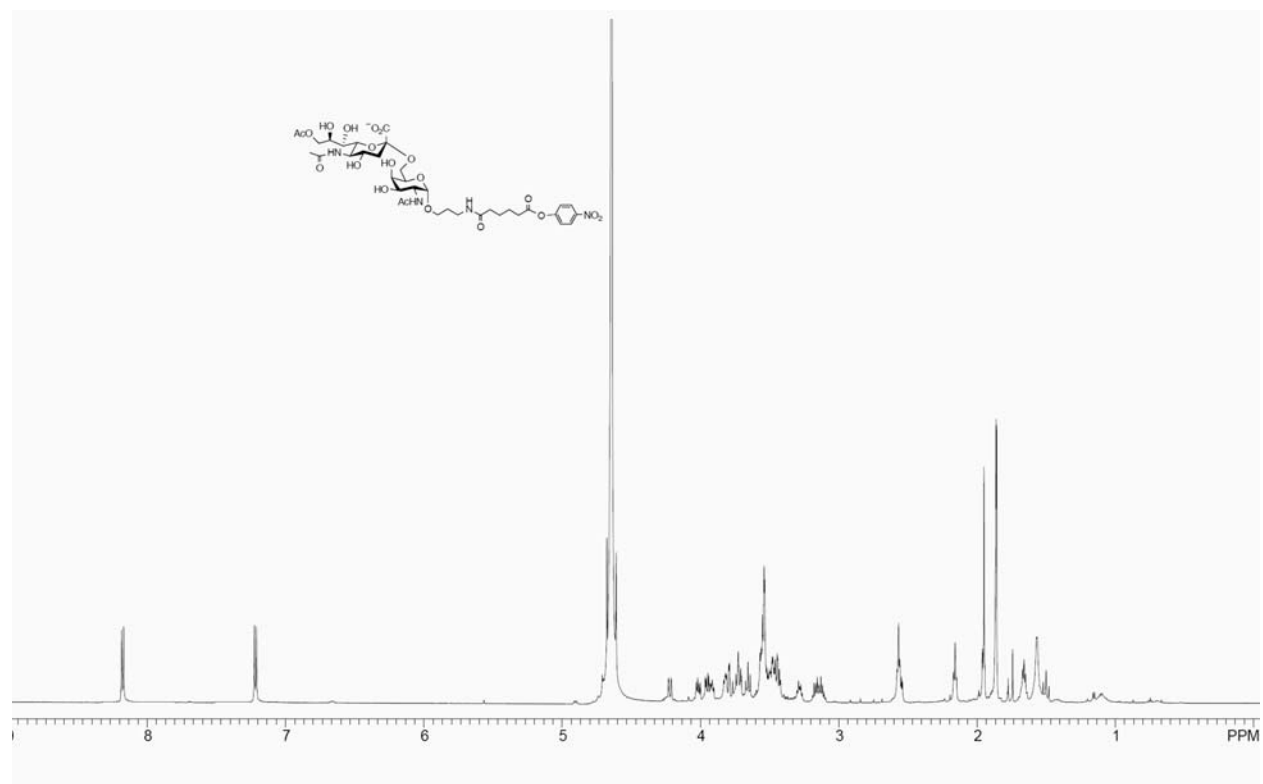

$^1\text{H}$  NMR spectrum of **15**

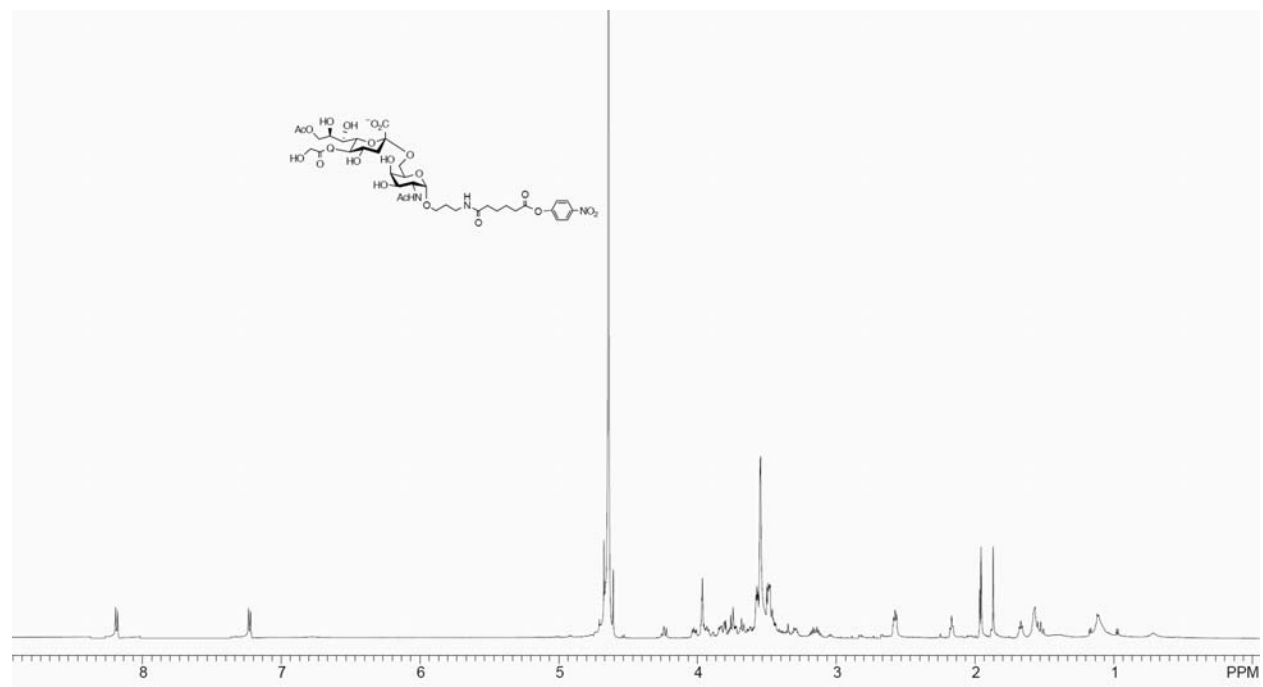

$^1\text{H}$  NMR spectrum of **25**

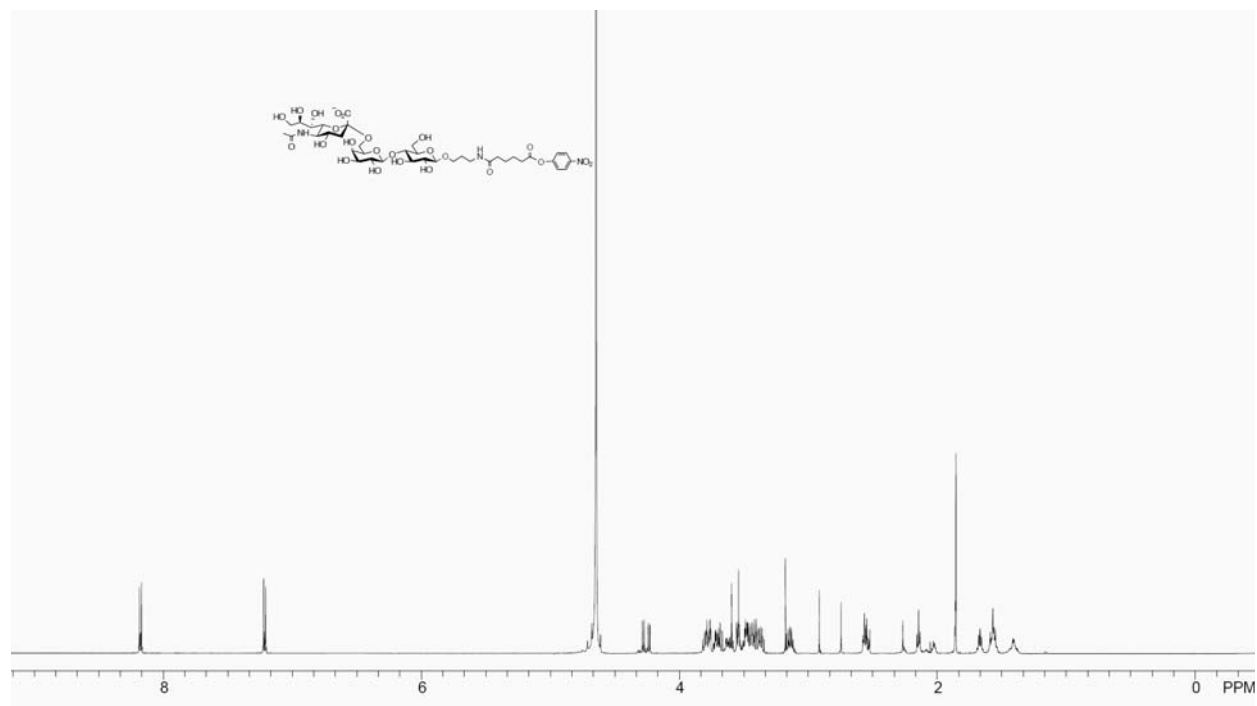

$^1\text{H}$  NMR spectrum of **26**

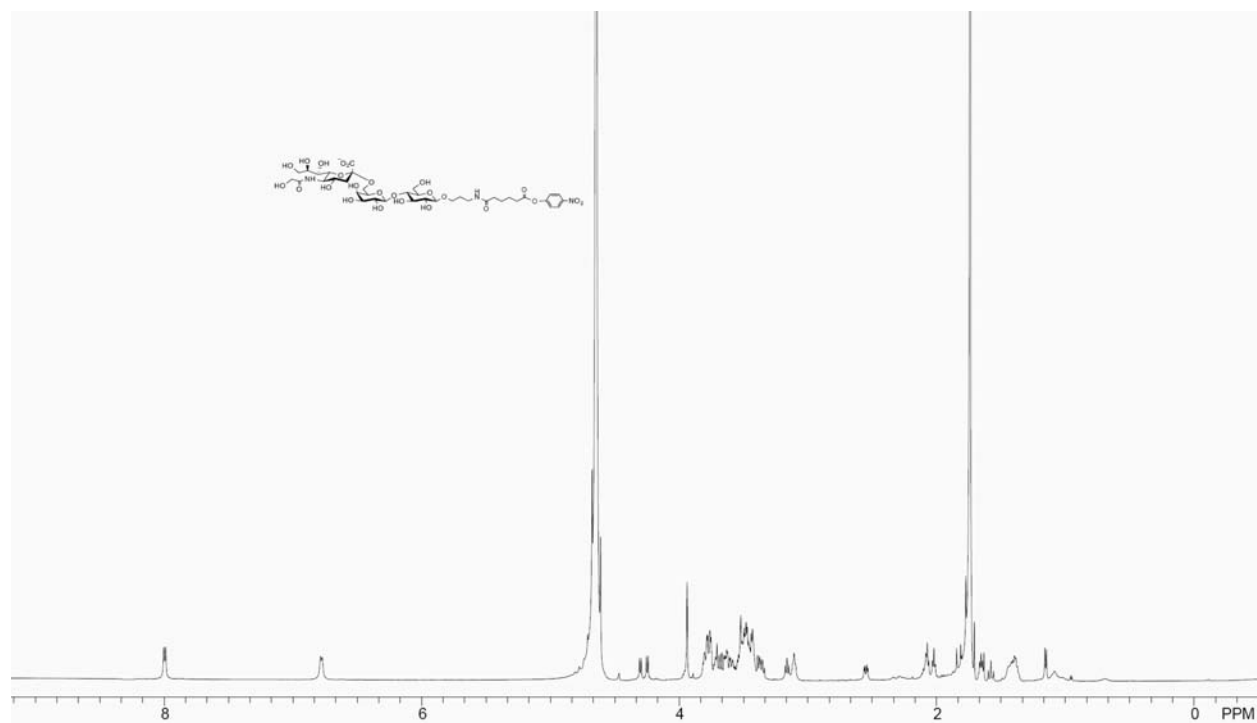



$^1\text{H}$  NMR spectrum of **27**

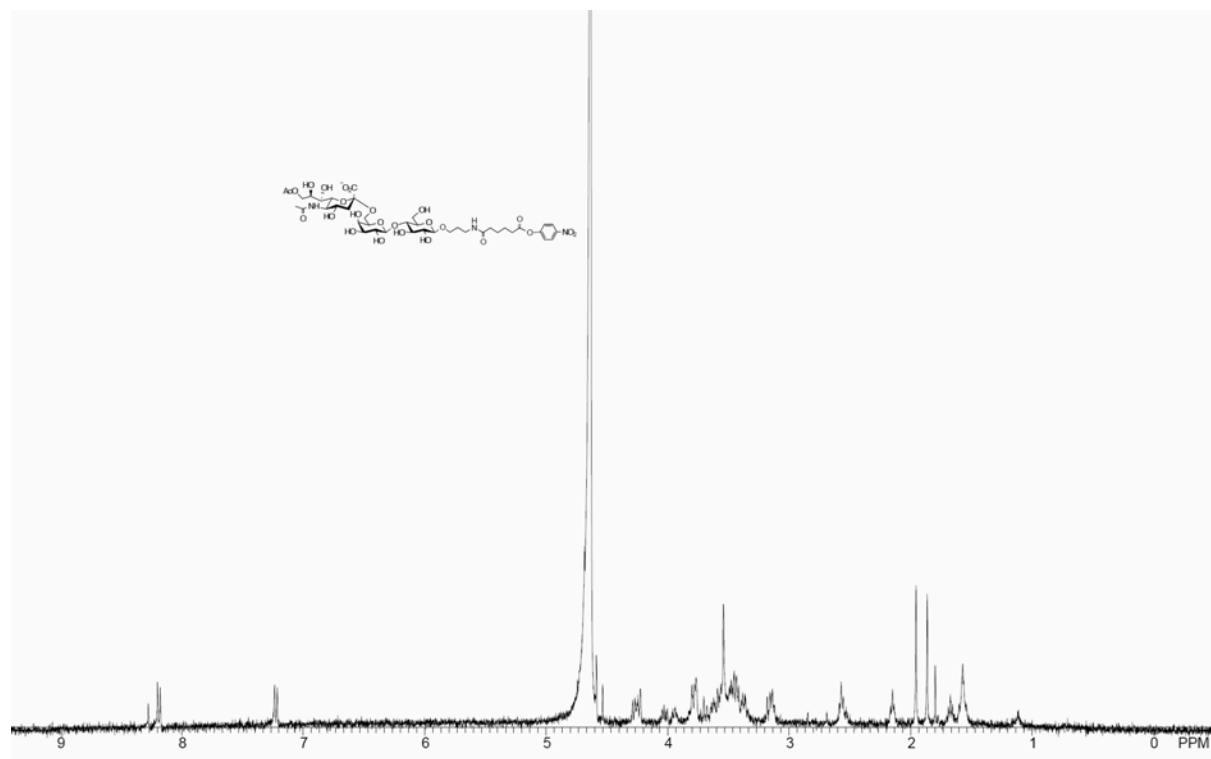

$^1\text{H}$  NMR spectrum of **28**

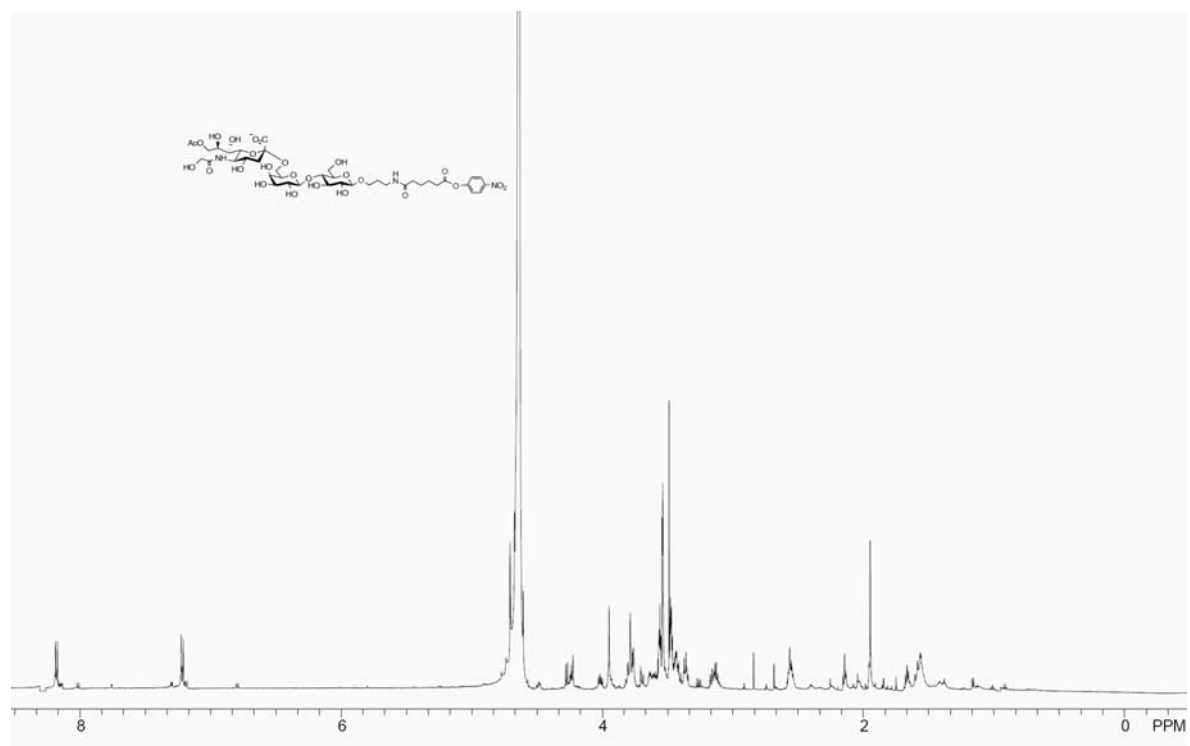

Supplement: b706407h.pdf [file b706407h.pdf]
